# Supplementary material for: Effects of Gluten on Gut Microbiota in Patients with Gastrointestinal Disorders, Migraine, and Dermatitis
Source: MDPI journal article supplement (doi:10.3390/nu16081228), 2024-04-20
Supplement: s1 [file s1]

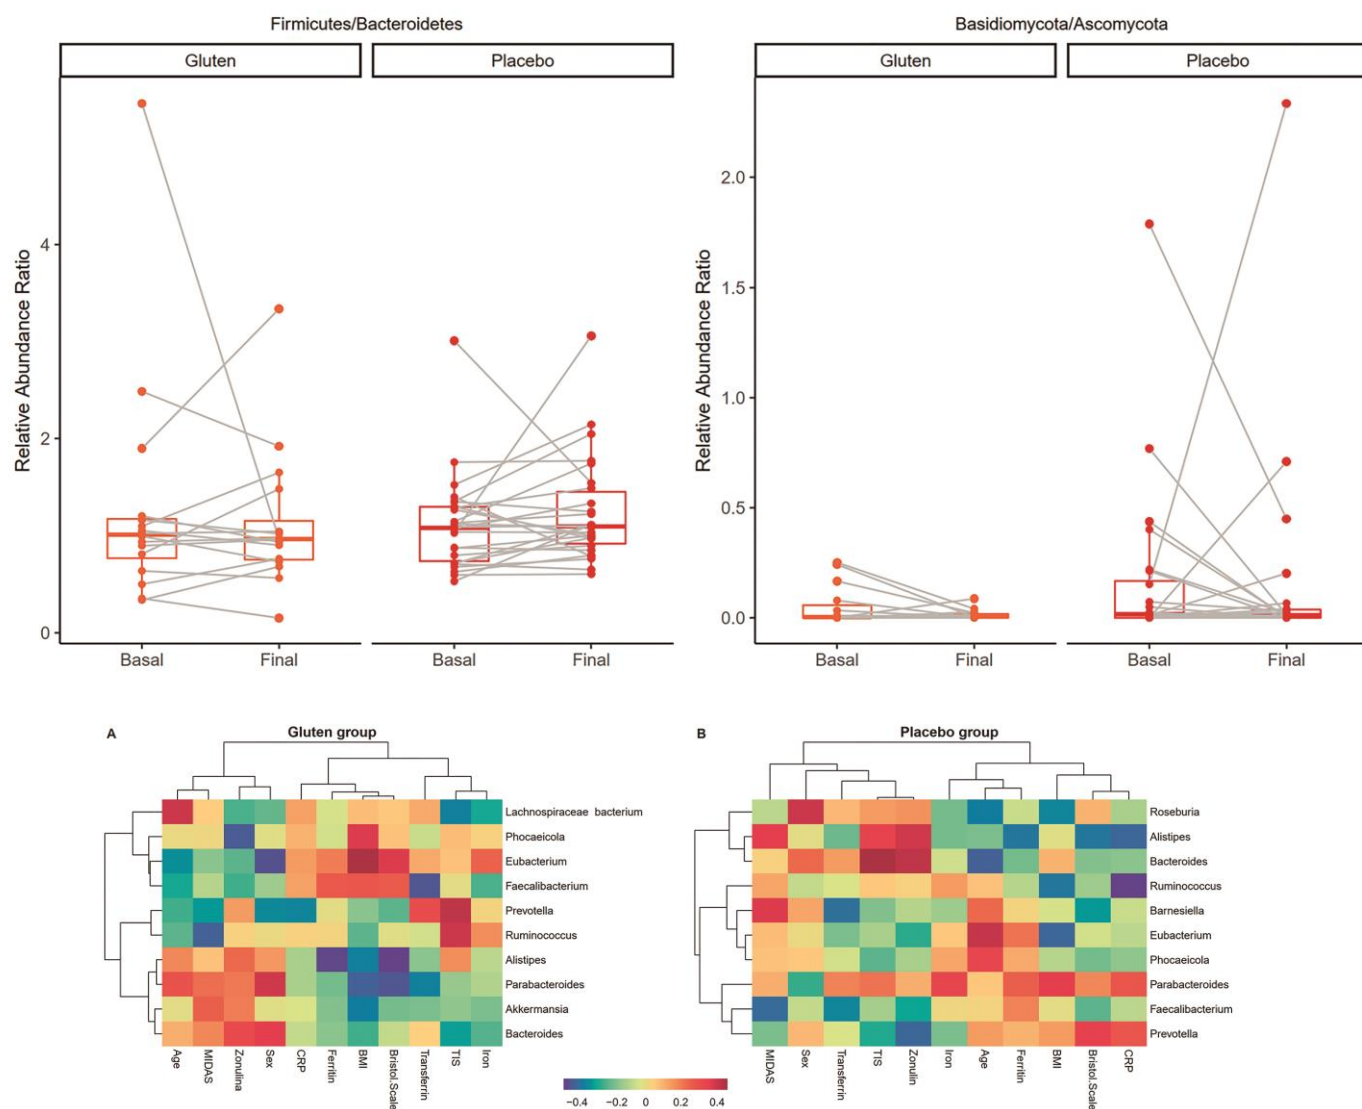

**Supplementary Figure S1.** Relative abundance of bacteria and correlations between bacteria and study variables **(A) - top** - Differences between the Firmicutes/Bacteroidetes ratio between the 2 times (baseline-final) between both study groups -gluten and placebo-, measured in relative abundance; **(B) - top** - Differences between the Basidiomycota/Ascomycota ratio between the baseline-final and between both study groups, measured in relative abundance. **(A, B) - in the lower area** - Hierarchical clustering of correlations using the Spearman's test between bacterial genera (bottom) and study variables (right side) in the gluten and placebo group.

**Supplementary Table S1.** Migraine symptoms by time according to study group and with professional diagnosis of migraine.

|                           | <b>Gluten<br/>group<br/>(n = 12)</b> |              |          | <b>Placebo<br/>group<br/>(n = 12)</b> |               |             | <b>Δ Intergroup<br/>analysis</b> |
|---------------------------|--------------------------------------|--------------|----------|---------------------------------------|---------------|-------------|----------------------------------|
| <b>Migraine</b>           | <b>Basal</b>                         | <b>Final</b> | <b>P</b> | <b>Basal</b>                          | <b>Final</b>  | <b>p</b>    |                                  |
| Pain (0–10)               | 8 (6-8)                              | 7 (6-8)      | .754     | 6.33 ± 2.46                           | 5.83 ± 2.13   | .600        | <b>Ns</b>                        |
| Days with pain (3 months) | 7.5 (5.5-40.5)                       | 3 (1.5-13.5) | .109     | 31.17 ± 30.02                         | 11.83 ± 13.11 | <b>.037</b> | <b>Ns</b>                        |
| MIDAS                     | 26 (11.5-61.5)                       | 4.5 (0-40.5) | .388     | 57.33 ± 53.58                         | 16.25 ± 33.65 | <b>.019</b> | <b>Ns</b>                        |

MIDAS, Migraine Disability Assessment; NS, not significant.

**Supplementary Table S2.** Symptoms of atopic dermatitis by time according to the study group and with professional diagnosis of dermatitis.

|                            | <b>Gluten<br/>group<br/>(n = 6)</b> |              |          | <b>Placebo<br/>group<br/>(n = 14)</b> |                       |             | <b>Δ<br/>Intergroup<br/>Analysis</b> |
|----------------------------|-------------------------------------|--------------|----------|---------------------------------------|-----------------------|-------------|--------------------------------------|
| <b>Atopic dermatitis</b>   | <b>Basal</b>                        | <b>Final</b> | <b>P</b> | <b>Basal</b>                          | <b>Final</b>          | <b>p</b>    |                                      |
| Itchy skin (0–10)          | 3.5 ± 4.18                          | 2.33 ± 3.67  | .135     | 6.07 ± 2.24                           | 3 ± 3.31              | <b>.001</b> | <b>Ns</b>                            |
| Itchy scalp (0–10)         | 0 (0-0)                             | 0 (0-0)      | .317     | 2.5 (0-8)                             | 0 (0-6)               | <b>.031</b> | <b>Ns</b>                            |
| Dry skin intensity (0–10)  | 1.5 (0-4)                           | 0 (0-5)      | .655     | 6.86 ± 2.6<br>7.5 (6-8)               | 3 ± 3.35<br>1.5 (0-7) | <b>.001</b> | <b>Ns</b>                            |
| Pimples (0–10)             | 0 (0-0)                             | 0 (0-0)      | .317     | 0 (0-5)                               | 0 (0-0)               | .063        | <b>Ns</b>                            |
| Neck and chest area (0–10) | 0 (0-0)                             | 0 (0-0)      | .317     | 0 (0-5)                               | 0 (0-0)               | <b>.031</b> | <b>Ns</b>                            |
| Face (0–10)                | 0 (0-0)                             | 0 (0-0)      | .317     | 0 (0-6)                               | 0 (0-0)               | .375        | <b>Ns</b>                            |
| Arms and legs (0–10)       | 0 (0-0)                             | 0 (0-0)      | .317     | 0 (0-8)                               | 0 (0-0)               | .063        | <b>Ns</b>                            |
| Whole body (0–10)          | 0 (0-0)                             | 0 (0-0)      | .317     | 2.5 (0-8)                             | 0 (0-0)               | <b>.018</b> | <b>Ns</b>                            |
| TIS                        | 0.5 (0-2)                           | 0 (0-1)      | .655     | 2.93 ± 2.27                           | 1.71 ± 1.73           | .051        | <b>Ns</b>                            |

TIS, Three Item Severity score.

**Supplementary Table S3.** Iron metabolism, proteins, intestinal permeability, white, red and platelet series by time according to the study group.

|                                      | Gluten<br>group<br>(n = 17) |                         |          | Placebo<br>group<br>(n = 27) |                           |             | $\Delta$<br>Intergroup<br>analysis |
|--------------------------------------|-----------------------------|-------------------------|----------|------------------------------|---------------------------|-------------|------------------------------------|
| <b>Iron<br/>metabolism</b>           | <b>Basal</b>                | <b>Final</b>            | <b>p</b> | <b>Basal</b>                 | <b>Final</b>              | <b>p</b>    |                                    |
| Iron<br>( $\mu\text{g/dL}$ )         | 92.94 $\pm$<br>43.97        | 90.18 $\pm$<br>39.12    | .772     | 88.70 $\pm$<br>34.83         | 79.57 $\pm$<br>39.23      | .267        | <b>ns</b>                          |
| Ferritin<br>(ng/mL)                  | 57 (31-<br>131)             | 63 (25-<br>133)         | .454     | 59 (23-<br>93.5)             | 70 (28-<br>111.5)         | .248        | <b>ns</b>                          |
| Transferrin<br>(mg/dL)               | 234<br>(222-<br>254)        | 251<br>(215-<br>277)    | .210     | 240<br>(222.5-<br>265.5)     | 244<br>(222.5-<br>262.5)  | <b>.029</b> | <b>ns</b>                          |
| <b>Proteins</b>                      |                             |                         |          |                              |                           |             |                                    |
| C-<br>Reactive<br>Protein<br>(mg/dL) | 0.10<br>(0.05-<br>0.20)     | 0.10<br>(0.05-<br>0.10) | .424     | 0.1 (0.1-<br>0.35)           | 0.1 (0.1-<br>0.25)        | 1           | <b>ns</b>                          |
| <b>Intestinal<br/>permeability</b>   |                             |                         |          |                              |                           |             |                                    |
| Zonulin<br>(ng/mL)                   | 90.26 $\pm$<br>51.8         | 89.66 $\pm$<br>55.24    | .963     | 111.74 $\pm$<br>74.23        | 97.03 $\pm$<br>61.95      | .401        | <b>ns</b>                          |
| <b>White blood<br/>cells</b>         |                             |                         |          |                              |                           |             |                                    |
| Leukocytes                           | 6 (4.6-7)                   | 5.7 (4.5-<br>6.7)       | .332     | 5.9 (5.25-<br>7.4)           | 6.25<br>(5.25-<br>7.65)   | .572        | <b>ns</b>                          |
| Neutrophils                          | 58.1<br>(55.4-<br>60.4)     | 55.2<br>(51.1-<br>60.4) | .909     | 56.45<br>(51.65-61)          | 55.5<br>(51.55-<br>59.75) | .792        | <b>ns</b>                          |
| Lymphocytes                          | 31.2<br>(28.5-<br>33.9)     | 33.5<br>(29.4-<br>36.5) | .332     | 33.15<br>(29.15-<br>35.9)    | 32.6<br>(27.05-<br>35.9)  | .531        | <b>ns</b>                          |
| Monocytes                            | 7.8 (7.1-<br>9.4)           | 7.8 (7.4-<br>9.6)       | .791     | 7.45 (6.45-<br>9.4)          | 7.45 (6.2-<br>9.15)       | .664        | <b>ns</b>                          |
| Eosinophils                          | 2.1 (1.4-<br>3.1)           | 2.1 (1.4-<br>2.6)       | .607     | 1.95 (1.55-<br>3.1)          | 1.95<br>(1.75-3)          | .701        | <b>ns</b>                          |
| Basophils                            | 0.7 (0.5-<br>0.8)           | 0.7 (0.5-<br>0.8)       | .534     | 0.6 (0.4-<br>0.9)            | 0.6 (0.5-<br>0.75)        | .526        | <b>Ns</b>                          |

|                        |                  |                  |      |                     |                    |      |           |
|------------------------|------------------|------------------|------|---------------------|--------------------|------|-----------|
| Absolute neutrophils   | 3.4 (2.5-4)      | 3.2 (2.8-3.6)    | .607 | 3.45 (2.65-4.15)    | 3.55 (2.8-4.45)    | .087 | <b>Ns</b> |
| Absolute lymphocytes   | 1.8 (1.3-1.9)    | 1.7 (1.5-2.1)    | .454 | 1.95 (1.65-2.4)     | 1.9 (1.7-2.3)      | .738 | <b>Ns</b> |
| Absolute monocytes     | 0.5 (0.4-0.5)    | 0.5 (0.4-0.5)    | .491 | 0.5 (0.4-0.6)       | 0.5 (0.4-0.6)      | .648 | <b>Ns</b> |
| Absolute eosinophils   | 0.1 (0.1-0.2)    | 0.1 (0.1-0.1)    | 1    | 0.1 (0.1-0.2)       | 0.1 (0.1-0.2)      | .791 | <b>Ns</b> |
| Absolute basophils     | 0.1 (0-0.1)      | 0 (0-0.1)        | .125 | 0 (0-0.1)           | 0 (0-0.1)          | 1    | <b>Ns</b> |
| <b>Red blood cells</b> |                  |                  |      |                     |                    |      |           |
| Red blood cells        | 4.4 (4.2-5)      | 4.6 (4.2-4.9)    | .969 | 4.5 (4.2-4.75)      | 4.5 (4.3-4.85)     | .218 | <b>Ns</b> |
| Hemoglobin             | 13.5 (13-15)     | 14 (12.9-14.6)   | .956 | 13.65 (12.7-14.35)  | 13.7 (12.65-14.2)  | .269 | <b>Ns</b> |
| Hematocrit             | 40.8 (38.9-45.7) | 41.6 (39.5-44.1) | .964 | 41 (37.85-42.65)    | 40.5 (38-42.55)    | .406 | <b>Ns</b> |
| MCV                    | 89.5 (87.8-93.5) | 89.9 (88.5-92.8) | .844 | 90.35 (87.9-93.25)  | 90.9 (88.4-92.9)   | .359 | <b>Ns</b> |
| MCH                    | 30.4 (29.3-31.1) | 30.1 (29.1-31.2) | .605 | 30.15 (28.95-31.8)  | 30.45 (29-31.6)    | .269 | <b>Ns</b> |
| MCHC                   | 33 (32.4-34)     | 33.2 (32.8-33.5) | .938 | 33.4 (32.75-34)     | 33.45 (32.9-34.15) | .838 | <b>Ns</b> |
| RDW                    | 13 (12.4-13.5)   | 13 (12.5-13.2)   | .607 | 12.85 (12.4-13.25)  | 12.65 (12.3-13.35) | .237 | <b>Ns</b> |
| <b>Platelets</b>       |                  |                  |      |                     |                    |      |           |
| Platelets              | 235 (186-262)    | 220 (197-252)    | .332 | 266.5 (227.5-290.5) | 260 (235.5-276.5)  | 1    | <b>Ns</b> |

|     |                         |                         |      |                           |                        |      |           |
|-----|-------------------------|-------------------------|------|---------------------------|------------------------|------|-----------|
| MPV | 11.6<br>(11.3-<br>12.2) | 11.8<br>(11.1-<br>12.4) | .321 | 11.25<br>(10.6-<br>12.05) | 11.3<br>(10.55-<br>12) | .786 | <b>Ns</b> |
|-----|-------------------------|-------------------------|------|---------------------------|------------------------|------|-----------|

MCV, mean corpuscular volume; MCH, mean corpuscular hemoglobin; MCHC, mean corpuscular hemoglobin concentration; RDW, red cell distribution width; MPV, mean platelet volume.
